# Supplementary material for: Decellularized extracellular matrix scaffolds identify full-length collagen VI as a driver of breast cancer cell invasion in obesity and metastasis
Source: PubMed Central journal article supplement — Sci Adv. 2020 Oct 21;6(43):eabc3175. doi: 10.1126/sciadv.abc3175 (PMC7577726; doi:10.1126/sciadv.abc3175), 2020-10-21
Supplement: abc3175_SM.pdf [file abc3175_SM.pdf]

## Supplementary Materials for

### **Decellularized extracellular matrix scaffolds identify full-length collagen VI as a driver of breast cancer cell invasion in obesity and metastasis**

Andrew L. Wishart, Sydney J. Conner, Justinne R. Guarin, Jackson P. Fatherree, Yifan Peng, Rachel A. McGinn, Rebecca Crews, Stephen P. Naber, Martin Hunter, Andrew S. Greenberg, Madeleine J. Oudin\*

\*Corresponding author. Email: [madeleine.oudin@tufts.edu](mailto:madeleine.oudin@tufts.edu)

Published 21 October 2020, *Sci. Adv.* **6**, eabc3175 (2020)  
DOI: 10.1126/sciadv.abc3175

#### **The PDF file includes:**

Figs. S1 to S9  
Legends for movies S1 to S9

#### **Other Supplementary Material for this manuscript includes the following:**

(available at [advances.sciencemag.org/cgi/content/full/6/43/eabc3175/DC1](https://advances.sciencemag.org/cgi/content/full/6/43/eabc3175/DC1))

Movies S1 to S9

## Supplementary Figures

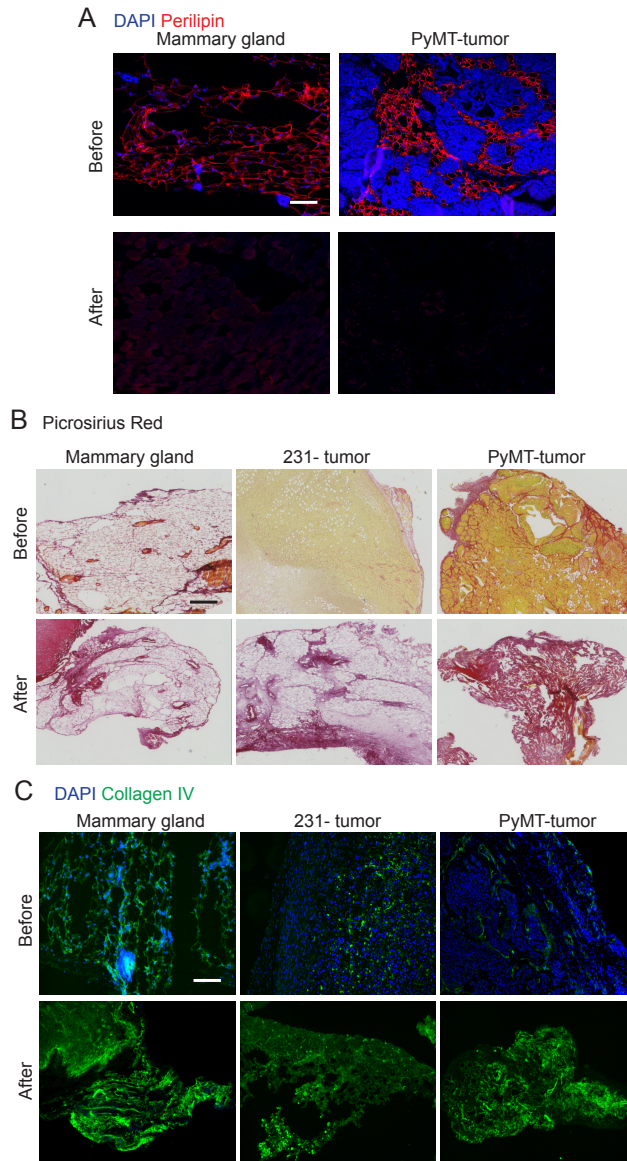

**Figure S1: Validation of decellularization method.** Tissue sections from healthy mammary gland, xenograft 231-tumor and PyMT-tumors from before and after decellularization stained with A) Perilipin and DAPI, B) Picrosirius Red and C) Collagen IV and DAPI. Scale bars is 100µm for A,C and 200µm for B.

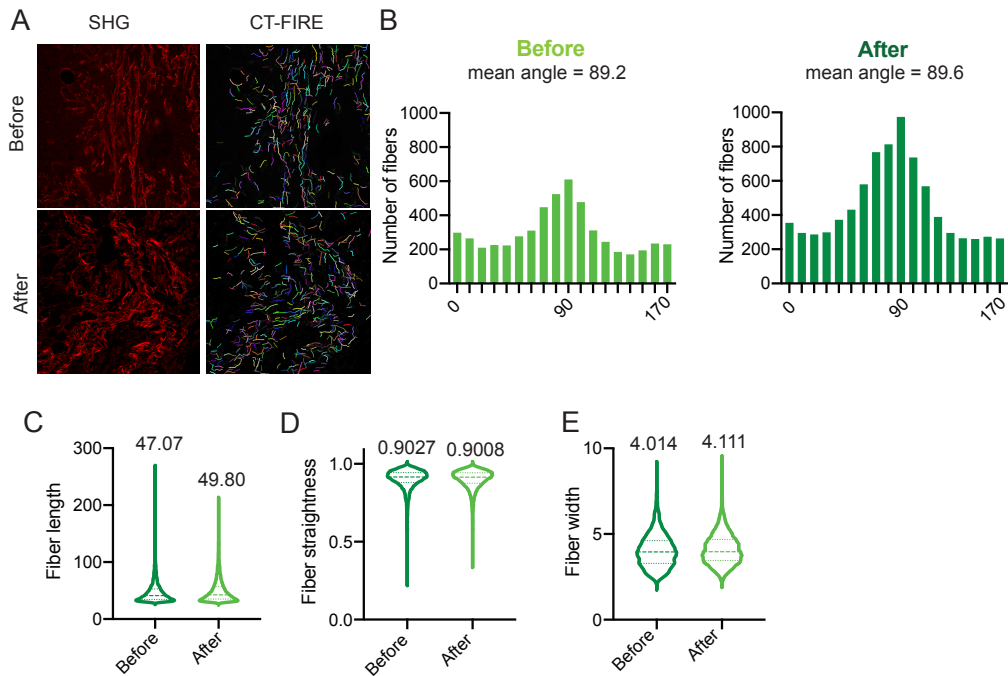

**Figure S2: Decellularization does not alter Collagen fiber organization.** Tissue sections from PyMT-tumors from before and after decellularization were imaged via second harmonic to visualize Collagen fibers and images were analyzed with CT-FIRE (A). Analysis shows that decellularization does not alter B) the mean angle and distribution, C) length, D) straightness and E) width of Collagen I fibers. Over 5000 Collagen I fibers analyzed per condition.

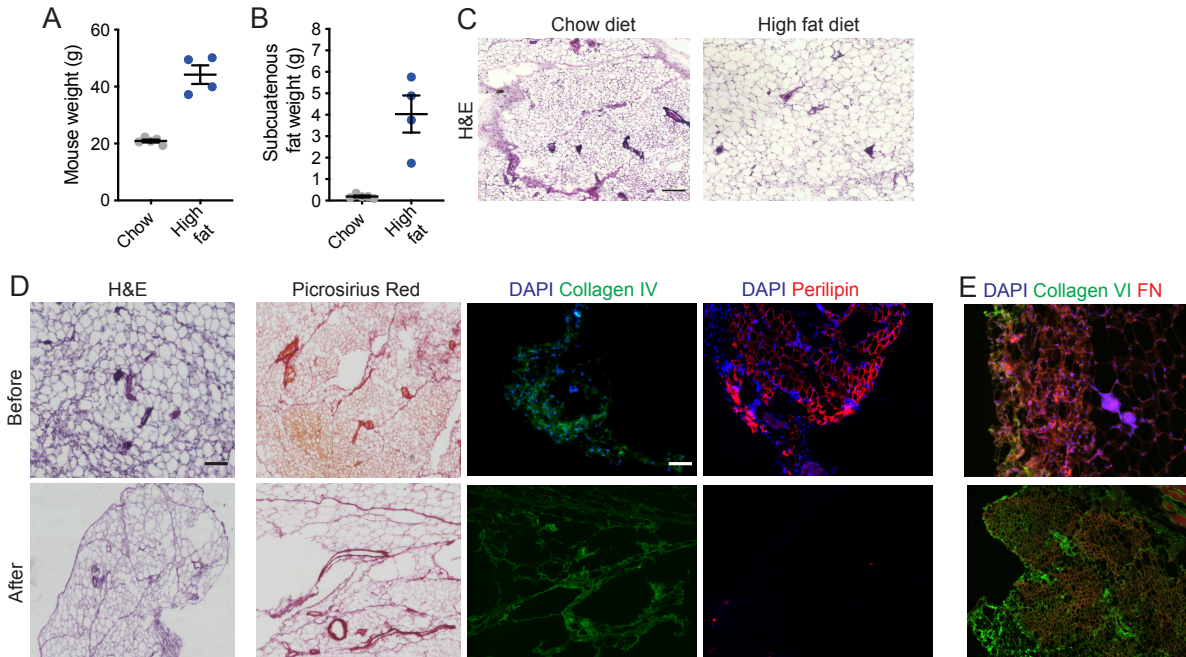

**Figure S3: Diet-induced obesity model and staining validation for obese mice.** C57BL/6 female mice were fed on chow (n=4) or high fat diet (n=4) for 16 weeks after which both total body weight (A) and subcutaneous fat weight (B) were measured. C) H&E staining sections of mammary gland from chow and high fat diet fed mice were H&E processed, revealing significant hypertrophy of adipocytes (typical of fatty tissue) in the glands of mice fed with high fat diet (Scale bar, 200 $\mu$ m). Tissue sections from mammary gland from obese mice from before and after decellularization stained with D) H&E, Picrosirius Red, Collagen IV and Perilipin and E) Collagen VI and FN and DAPI. Scale bars is 200 $\mu$ m for chromogenic stains and 100 $\mu$ m for immunofluorescence.

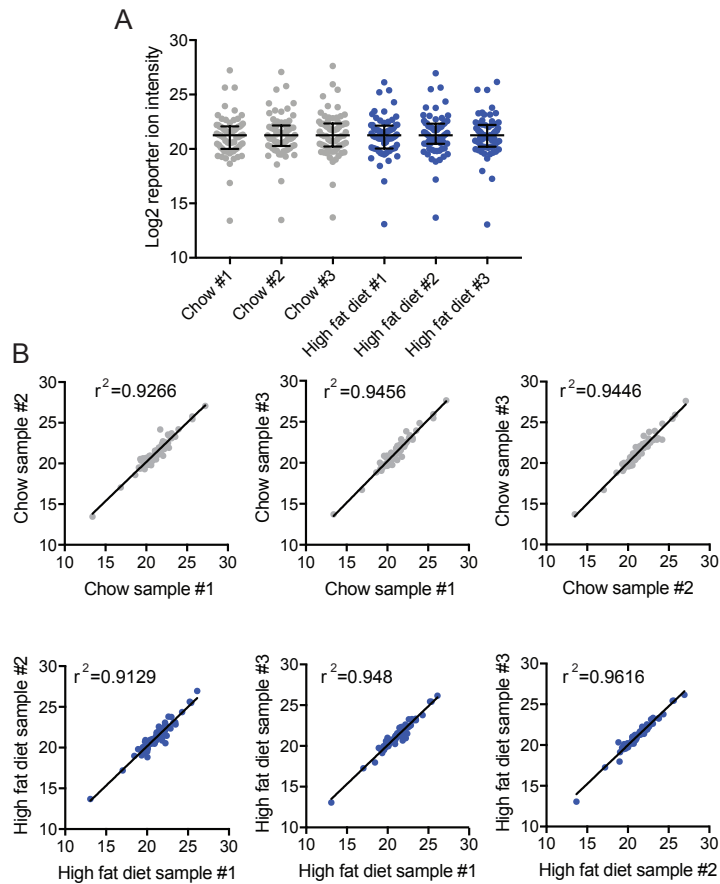

**Figure S4: ECM proteomics data normalization and biological group correlations.**

A) ECM reporter ion intensities were median-centered and log<sub>2</sub>-transformed, the bars represent median with interquartile range. This normalizes the data, correcting for any potential inter-sample protein loading variances on the mass spectrometer, to enable accurate comparisons between abundance of ECM proteins. B) Scatterplots with  $r^2$  correlation values between biological replicates reveal a strong correlation between ECM proteins within the chow diet fed mice group and also between ECM proteins within the high fat diet fed mice group (values on x and y axes are log<sub>2</sub> of reporter ion intensity).

A

| Core Matrisome     |       |                    |       |
|--------------------|-------|--------------------|-------|
| ECM Glycoproteins  |       | Collagens          |       |
| Entrez Gene Symbol | Obese | Entrez Gene Symbol | Obese |
| TGFBI              | 25.44 | COL1A1             | 26.47 |
| LAMC1              | 25.44 | COL3A1             | 21.99 |
| DPT                | 23.31 | COL7A1             | 21.89 |
| LAMA2              | 23.18 | COL6A6             | 22.10 |
| NID1               | 23.14 | COL6A5             | 22.13 |
| FBN1               | 22.67 | COL5A2             | 21.79 |
| FN1                | 22.45 | COL2A1             | 21.74 |
| EMILIN2            | 22.15 | COL11A1            | 21.71 |
| LAMB3              | 21.76 | COL15A1            | 21.57 |
| FGG                | 22.11 | COL6A1             | 21.07 |
| MFGE8              | 21.38 | COL12A1            | 21.43 |
| LAMA3              | 21.04 | COL6A2             | 21.02 |
| PAPLN              | 21.25 | COL5A1             | 20.27 |
| MFAP4              | 21.09 | COL4A1             | 20.29 |
| NID2               | 21.30 | COL4A2             | 19.86 |
| EMILIN1            | 20.83 | COL14A1            | 20.03 |
| FGA                | 21.23 | COL16A1            | 19.17 |
| VTN                | 20.88 | COL1A2             | 13.31 |
| LAMB1              | 20.72 |                    |       |
| LAMA4              | 20.78 |                    |       |
| FGB                | 20.57 |                    |       |
| ELN                | 20.09 |                    |       |
| VWA1               | 19.98 |                    |       |
| LAMB2              | 19.84 |                    |       |
| TINAGL1            | 19.55 |                    |       |
| FBLN5              | 19.51 |                    |       |
| LAMA5              | 19.53 |                    |       |

  

| Proteoglycans      |       |
|--------------------|-------|
| Entrez Gene Symbol | Obese |
| BGN                | 24.17 |
| PRG2               | 22.47 |
| PRELP              | 21.83 |
| OGN                | 21.86 |
| ASPN               | 21.51 |
| LUM                | 21.37 |
| DCN                | 18.53 |
| HSPG2              | 17.16 |

B

| Matrisome-associated    |       |                    |       |
|-------------------------|-------|--------------------|-------|
| ECM-affiliated Proteins |       | Secreted factors   |       |
| Entrez Gene Symbol      | Obese | Entrez Gene Symbol | Obese |
| ANXA2                   | 23.38 | S100A11            | 20.51 |
| LGALS1                  | 23.30 | POSTN              | 19.53 |
| ANXA1                   | 22.60 |                    |       |
| ANXA5                   | 21.73 |                    |       |
| LMAN1                   | 22.54 |                    |       |
| ANXA4                   | 20.89 |                    |       |
| ANXA7                   | 20.51 |                    |       |
| ANXA6                   | 20.57 |                    |       |
| ANXA11                  | 19.86 |                    |       |
| ANXA3                   | 19.90 |                    |       |

  

| ECM regulators     |       |
|--------------------|-------|
| Entrez Gene Symbol | Obese |
| ITIH5              | 21.89 |
| TGM2               | 21.46 |
| SERPINH1           | 19.80 |

Log2 average reporter ion intensity: Low to High

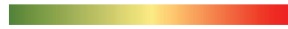

### Figure S5: Matrisome profile of obese mammary fat pad.

A) Core matrisome list, including ECM glycoproteins, collagens and proteoglycans. B) Matrisome-associated list including ECM-affiliated proteins, secreted factors and ECM regulators. Proteins were annotated according to the Matrisome Project. Data are the result of 3 biological replicates with the average log<sub>2</sub> reporter ion intensity reported.

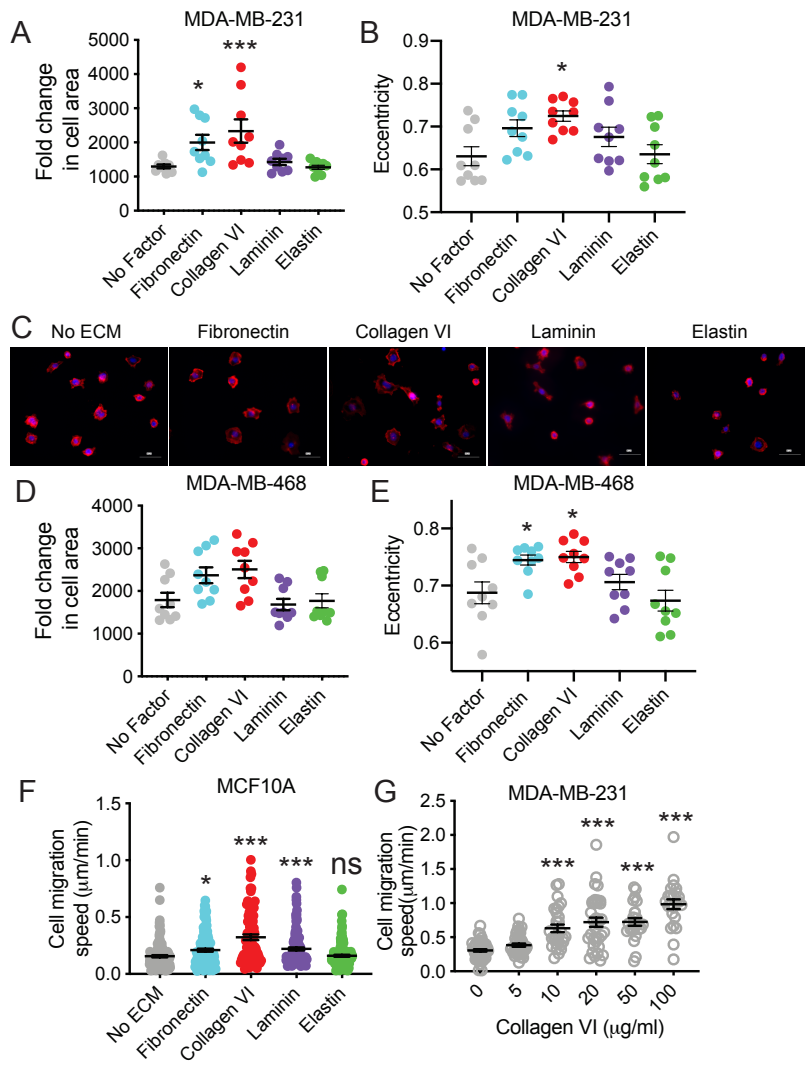

### Figure S6: Collagen VI drives adhesion and migration of several breast cancer cell lines

Quantification of cell area (A) and cell eccentricity (B) for MDA-MB-231 cells seeded onto wells coated with 20µg/ml Fibronectin, Collagen VI, Laminin or Elastin and allowed to adhere for 2hrs. C) Representative images of MDA-MB-468 breast cancer cells seeded on the different substrates (Scale bar = 50µm). Quantification of cell area (D) and cell eccentricity (E) for MDA-MB-468 cells on 20µg/ml Fibronectin, Collagen VI, Laminin or Elastin and allowed to adhere for 2hrs. Graphs show data from 3 independent experiments and average from 3 different fields of view per experiment. Significance was determined by a nonparametric Kruskal-Wallis test with Dunn's multiple testing correction, with \* $p < 0.05$ , \*\*\* $p < 0.005$ . F) Cell migration speed of pre-neoplastic mammary epithelial cell line MCF10A cells on 20µg/ml Fibronectin, Collagen VI, Laminin or Elastin and allowed to adhere for 2hrs. Each point represents the average speed of a cell over the time course (16hrs). G) Cell migration speed of MDA-MB-231 cells on different concentrations of Collagen VI. Graphs show individual cell data and mean  $\pm$  SEM. Significance was determined by a nonparametric Kruskal-Wallis test with Dunn's multiple testing correction, with \* $p < 0.05$  and \*\*\* $p < 0.005$ . For each experiment, data pooled from at least 3 independent experiments.

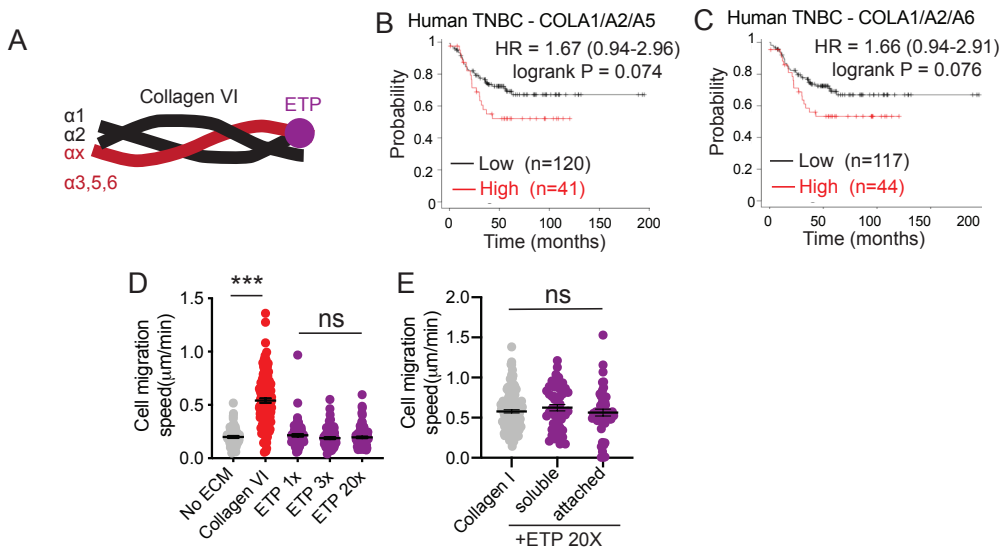

**Figure S7: Collagen VI chains and ETP in TNBC**

A) Endotrophin (ETP) is a small terminal peptide on the  $\alpha 3$  chain. Kaplan-Meier curve of human TNBC breast cancer patients with low vs high mRNA of COL6A1/COL6A2/COL6A4 (B) and COL6A1/COL6A2/COL6A5 (C), data from (37). D) Cell migration speed of MDA-MB-231 cells on full length Collagen VI or ETP (at 1x, 3x and 20x the relative amount to the ETP present on a full length Collagen VI strand). E) Cell migration speed of MDA-MB-231 cells seeded on Collagen I in combination with ETP or with ETP in the media.



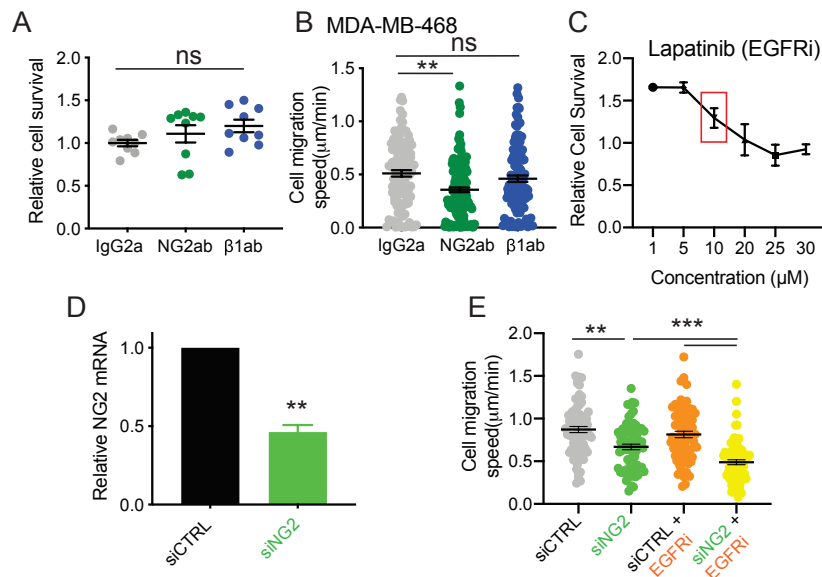

### Figure S8: Investigation into receptors mediating Collagen VI-driven cancer cell migration

A) Cell survival of MDA-MB-231 cells treated with IgG2a, NG2 targeting antibody (NG2ab) or  $\beta$ 1 integrin inhibitory antibody ( $\beta$ 1ab) for 16hrs. B) Cell migration speed of MDA-MB-468 cells seeded on 20 $\mu$ g/ml Collagen VI and treated with IgG2a, NG2 targeting antibody (NG2ab) or  $\beta$ 1 integrin inhibitory antibody ( $\beta$ 1ab). B) Graph shows individual cell data and mean  $\pm$  SEM. Significance was determined by a nonparametric Kruskal-Wallis test with Dunn's multiple testing correction, with  $**p < 0.01$ . For each experiment, data pooled from at least 3 independent experiments. C) Dose response curves plotting the effect of Lapatinib on MDA-MB-231 cell survival after 16hrs. Box represents dose chosen for experiments in Figure 5 & 6. D) Relative mRNA levels of NG2 measured by qPCR in MDA-MB-231 cells 2h after being transfected with siCTRL and siNG2. E) Cell migration speed of MDA-MB-231 cells seeded on 20 $\mu$ g/ml Collagen VI overnight 72h after transfection with siCTRL or siNG2, alone or in combination with 10 $\mu$ M Lapatinib. Significance was determined by a nonparametric Kruskal-Wallis test with Dunn's multiple testing correction, with  $**p < 0.01$ . For each experiment, data pooled from 3 independent experiments.

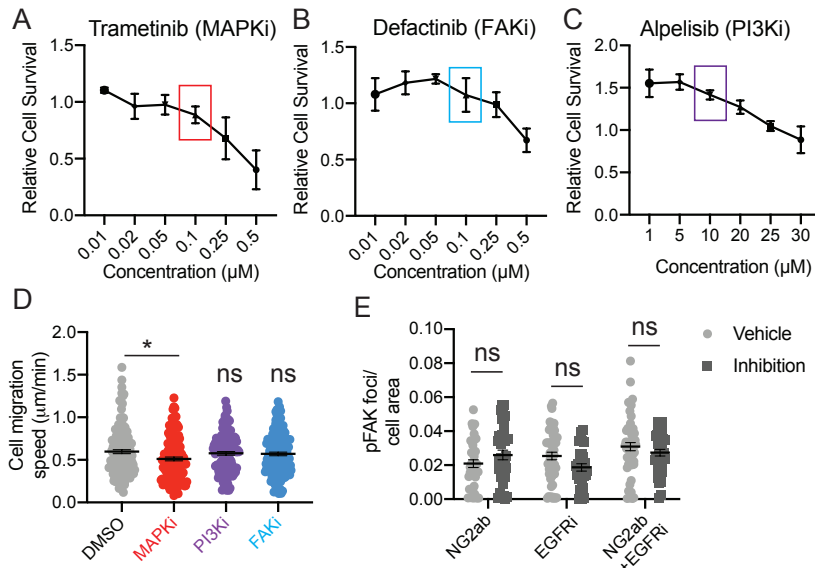

### Figure S9: Investigation into downstream signaling pathways mediating Collagen VI-driven cancer cell migration

Dose response curves plotting the effect of A) Trametinib (MAPK inhibitor), B) Defactinib (FAK inhibitor), C) Alpelisib (PI3K inhibitor) on MDA-MB-231 cell survival after 16hrs. Box represents dose chosen for experiments in Figure 5 & 6. D) Cell migration speed of MDA-MB-231 cells plated on Collagen VI and treated with Alpelisib (PI3K inhibitor, 10μM), Defactinib (FAK inhibitor, 0.1μM) and Trametinib (MEK inhibitor, 0.1μM). Graph shows individual cell data and mean ± SEM. Significance was determined by a nonparametric Kruskal-Wallis test with Dunn's multiple testing correction, with \* $p < 0.05$ . For each experiment, data pooled from at least 3 independent experiments. E) Number pFAK397 in breast cancer cells plated on Collagen VI for 2hrs and treated with NG2ab, EGFR inhibitor Lapatinib (10μM) or a combination of both. Data pooled for 3 experiments.

## **Supplementary Videos:**

Movie S1: 231-GFP cells seeded onto dECM obtained from healthy mammary gland. Cells imaged every 10 mins for 16h.

Movie S2: 231-GFP cells seeded onto dECM obtained from 231-tumor xenografts. Cells imaged every 10 mins for 16h.

Movie S3: PyMT-GFP cells seeded onto dECM obtained from the mammary gland of healthy FVB mice. Cells imaged every 10 mins for 16h.

Movie S4: PyMT-GFP cells seeded onto dECM obtained from PyMT-MMTV mammary tumors. Cells imaged every 10 mins for 16h.

Movie S5: 231-GFP cells seeded onto dECM obtained from the mammary glands of obese C57Bl6 mice. Cells imaged every 10 mins for 16h.

Movie S6: 231-GFP cells plated on glass and imaged every 10 mins for 16h.

Movie S7: 231-GFP cells plated on Collagen VI (20ug/ml) and imaged every 10 mins for 16h.

Movie S8: 231-GFP cells seeded onto dECM obtained from the mammary glands of obese C57Bl6 mice and treated with IgG2a. Cells imaged every 10 mins for 16h.

Movie S9: 231-GFP cells seeded onto dECM obtained from the mammary glands of obese C57Bl6 mice and treated with NG2ab. Cells imaged every 10 mins for 16h.
